# Supplementary material for: Exploring the Potential of the Model Cyanobacteria Synechococcus PCC 7002 and PCC 7942 for the Photoproduction of High-Value Terpenes: A Comparison with Synechocystis PCC 6803
Source: Biomolecules. 2023 Mar 9;13(3):504. doi: 10.3390/biom13030504 (PMC10046388; doi:10.3390/biom13030504)
Supplement: Supplementary file 1 [file biomolecules-13-00504-s001.zip › Figure S6.pdf]

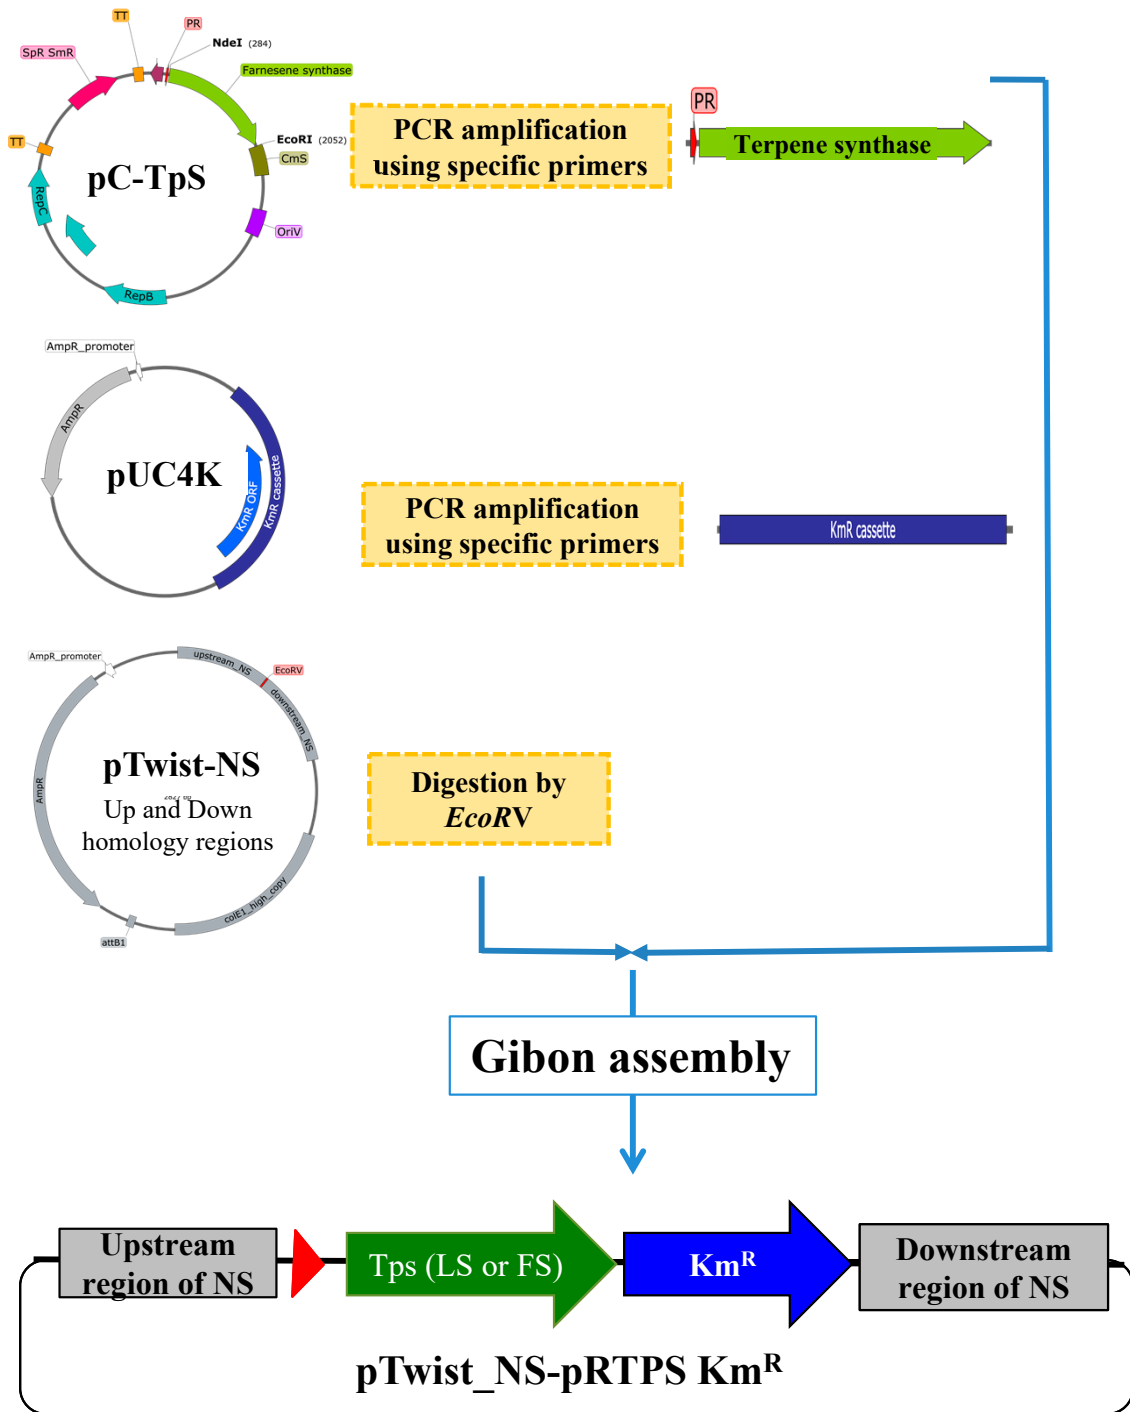

**Figure S6. Construction of the pR-TPS-Km<sup>R</sup> DNA cassette for targeted insertion of a terpene synthase genes (LS or FS) in the neutral chromosome sites of *Synechococcus* PCC 7002 (NS<sub>7002</sub>) or *Synechococcus* PCC 7942 (NSI<sub>7942</sub>)**

First, the **pR-TPS** gene (expression of the **terpene synthase** gene from the **pR** promoter) and the **Km<sup>R</sup>** marker were PCR amplified from the plasmids pC-TpS and pUC4K, respectively (Table S1). Second, the pTwist\_NS plasmid was opened at its unique *EcoRV* restriction site flanked by the two chromosomal DNA regions surrounding the NS<sub>7002</sub> or NSI<sub>7942</sub> neutral sites (500 bp in length for NS<sub>7002</sub> and 300 bp for NSI<sub>7942</sub>). Third, all three DNA cassettes (**pR-TPS**, **Km<sup>R</sup>** and pTwist\_NS) were assembled by Gibson® cloning. The resulting pTwist\_NS<sub>7002</sub>-TPS-Km<sup>R</sup> and pTwist\_NS<sub>7942</sub>-TPS-Km<sup>R</sup> plasmids were transformed to S.7002 or S.7942 to insert the **pR-TPS\_Km<sup>R</sup>** cassette in the neutral chromosomal sites NS<sub>7002</sub> or NSI<sub>7942</sub>.
