# Supplementary material for: Exploring the Potential of the Model Cyanobacteria Synechococcus PCC 7002 and PCC 7942 for the Photoproduction of High-Value Terpenes: A Comparison with Synechocystis PCC 6803
Source: Biomolecules. 2023 Mar 9;13(3):504. doi: 10.3390/biom13030504 (PMC10046388; doi:10.3390/biom13030504)
Supplement: Supplementary file 1 [file biomolecules-13-00504-s001.zip › Figure S8.pdf]

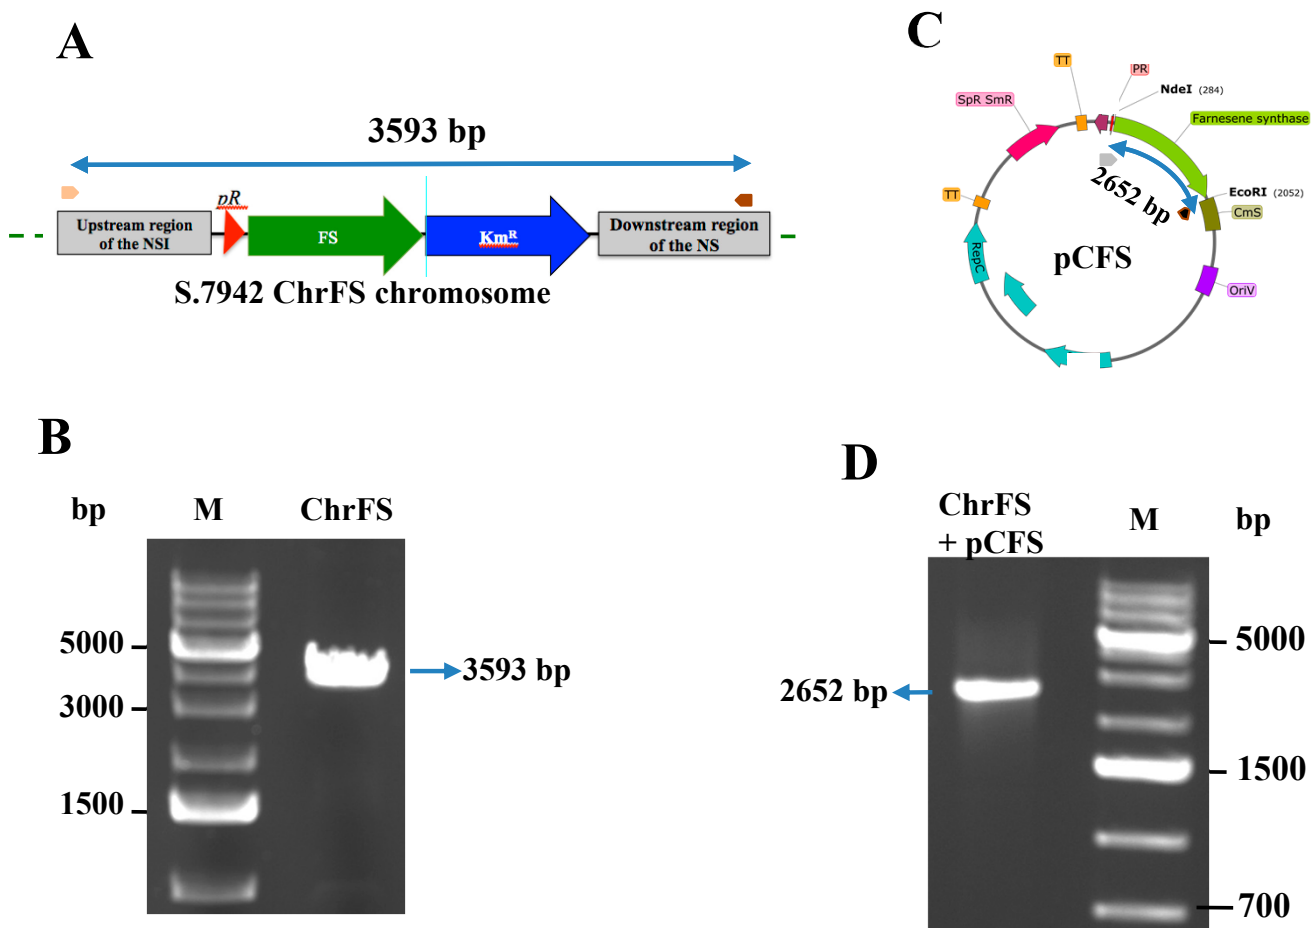

**Figure S8. PCR verification of the presence of the farnesene synthase gene propagated by either or both the pCFS plasmid or the NSI<sub>7942</sub> neutral chromosomal site of *Synechococcus* PCC 7942**

(A) Schematic representation of the pR-FS-Km<sup>R</sup> DNA cassette integrated in the NSI<sub>7942</sub> chromosome site of S.7942. Genes are represented by wide shapes colored in green (farnesene synthase gene, FS), grey (NSI<sub>7942</sub> flanking regions), blue (Km<sup>R</sup> marker) or red (*pR* promoter). PCR primers and the resulting 3593 bp DNA product are indicated by colored arrows.

(B) Typical UV-light image of the agarose gel showing the 3593 bp PCR product of the ChrFS strain harboring the pR-FS-Km<sup>R</sup> DNA cassette in the NSI<sub>7942</sub> chromosome site of otherwise WT cells of S.7942. Size marker (M) = Genruler 1 kb Plus DNA Ladder (Thermofisher).

(C) Schematic representation of the pCFS plasmid showing the *pR* promoter and FS gene as the small red triangle and green arrows, respectively. PCR primers and the corresponding 2652 bp DNA product are indicated by colored arrows.

(D) Typical agarose gel showing the 2652 bp PCR product of the pR-FS gene of pCFS replicating in the ChrFS strain generating the ChrFS+pCFS strain. Size marker (M) = Genruler 1 kb Plus DNA Ladder (Thermofisher).
