# Supplementary material for: Exploring the Potential of the Model Cyanobacteria Synechococcus PCC 7002 and PCC 7942 for the Photoproduction of High-Value Terpenes: A Comparison with Synechocystis PCC 6803
Source: Biomolecules. 2023 Mar 9;13(3):504. doi: 10.3390/biom13030504 (PMC10046388; doi:10.3390/biom13030504)
Supplement: Supplementary file 1 [file biomolecules-13-00504-s001.zip › Table S1.pdf]

**Table S1 – Characteristics of the bacterial strains and plasmids used in this study**

| Strain/Plasmid                                                                                                        | Relevant features                                                                                                                                                                                             | Reference                                       |
|-----------------------------------------------------------------------------------------------------------------------|---------------------------------------------------------------------------------------------------------------------------------------------------------------------------------------------------------------|-------------------------------------------------|
| <i>Escherichia coli</i> CM404                                                                                         | <i>E. coli</i> strain harboring the self-transmissible plasmid pRK2013 enabling the conjugative transfer of RSF1010-derived pC plasmids into cyanobacteria                                                    | (Mermet-Bouvier and Chauvat, 1994)              |
| <i>Escherichia coli</i> TOP10                                                                                         | <i>E. coli</i> strain for cloning and conjugation                                                                                                                                                             | Invitrogen                                      |
| <i>Escherichia coli</i> NEB 10-beta                                                                                   | <i>E. coli</i> strain for cloning                                                                                                                                                                             | New England Biolabs                             |
| <i>Synechococcus</i> PCC 7002                                                                                         | Well studied, fast-growing unicellular and euryhaline cyanobacterium                                                                                                                                          | Pasteur Institute (Paris, France)               |
| <i>Synechococcus</i> PCC 7942                                                                                         | Well studied unicellular freshwater cyanobacterium                                                                                                                                                            | Pasteur Institute (Paris, France)               |
| <b>Plasmid cloning vectors</b>                                                                                        |                                                                                                                                                                                                               |                                                 |
| pTwist                                                                                                                | Amp <sup>R</sup> plasmid vector                                                                                                                                                                               | Twist Biosciences                               |
| pUC4K                                                                                                                 | Source of the Km <sup>R</sup> marker with no transcription terminator                                                                                                                                         | Pharmacia                                       |
| pC                                                                                                                    | RSF1010-derived plasmid vector (Sp <sup>R</sup> /Sm <sup>R</sup> , Cm <sup>R</sup> ) harboring the strong <i>p<sub>R</sub></i> promoter for constitutive gene expression in <i>E. coli</i> and cyanobacteria  | (Veaudor <i>et al.</i> , 2018)                  |
| <b>Replicative plasmids for strong constitutive expression of terpene synthase genes in cyanobacteria</b>             |                                                                                                                                                                                                               |                                                 |
| pCLS                                                                                                                  | pC derived plasmid (Sp <sup>R</sup> /Sm <sup>R</sup> , Cm <sup>S</sup> ) harboring the <i>Mentha spicata</i> 4S-limonene synthase gene (LS) cloned between the <i>NdeI</i> and <i>EcoRI</i> restriction sites | (Chenebault <i>et al.</i> , 2020) & This study  |
| pCPS                                                                                                                  | pC derivative (Sp <sup>R</sup> /Sm <sup>R</sup> , Cm <sup>S</sup> ) harboring the <i>Pinus taeda</i> pinene synthase gene (PS) cloned between <i>NdeI</i> and <i>EcoRI</i>                                    | (Blanc-Garin <i>et al.</i> , 2022) & This study |
| pCBS                                                                                                                  | pC derivative (Sp <sup>R</sup> /Sm <sup>R</sup> , Cm <sup>S</sup> ) carrying the <i>Abies grandis</i> bisabolene synthase gene (BS) cloned between <i>NdeI</i> and <i>EcoRI</i>                               | (Blanc-Garin <i>et al.</i> , 2022) & This study |
| pCFS                                                                                                                  | pC derivative (Sp <sup>R</sup> /Sm <sup>R</sup> , Cm <sup>S</sup> ) carrying the <i>Picea abies</i> farnesene synthase gene (FS) cloned between <i>NdeI</i> and <i>EcoRI</i>                                  | (Blanc-Garin <i>et al.</i> , 2022) & This study |
| <b>Plasmids for gene cloning into the NS<sub>7002</sub> neutral chromosomal site of <i>Synechococcus</i> PCC 7002</b> |                                                                                                                                                                                                               |                                                 |
| pTwist_NS-S7002                                                                                                       | pTwist harboring an <i>EcoRV</i> restriction site flanked by two 500 bp chromosomal DNA regions for cloning genes in the NS <sub>7002</sub> neutral chromosome site of <i>Synechococcus</i> PCC 7002          | This study (Twist Bioscience) and Figure S7     |
| pTwist_NS-S7002prLSKm <sup>R</sup>                                                                                    | pTwist_NS-S7002 harboring the Km <sup>R</sup> DNA cassette expressing the <i>Mentha spicata</i> 4S-limonene synthase from the strong <i>p<sub>R</sub></i> promoter                                            | This study; Figure S7                           |
| <b>Plasmids for gene cloning into the NS<sub>7942</sub> neutral chromosomal site of <i>Synechococcus</i> PCC 7942</b> |                                                                                                                                                                                                               |                                                 |
| pTwist_NSI-S7942                                                                                                      | pTwist harboring an <i>SmaI</i> restriction site flanked by two 300 bp regions chromosomal DNA regions for cloning genes in the NSI <sub>7942</sub> neutral chromosome site of <i>Synechococcus</i> PCC 7942  | This study (Twist Bioscience) Figure S7         |
| pTwist_NSI-S7942-prFSKm <sup>R</sup>                                                                                  | pTwist_NS-S7942 harboring the Km <sup>R</sup> DNA cassette expressing the <i>Picea abies</i> farnesene synthase gene (FS) from the strong <i>p<sub>R</sub></i> promoter                                       | This study; Figure S8                           |

References:

- [15] Mermet-Bouvier, P.; Chauvat, F. *Curr. Microbiol.* **1994**, *28*, 145–148, doi:10.1007/BF01571055.
- [23] Chenebault, C. *et al. Front. Microbiol.* **2020**, *11*, 586–601, doi:10.3389/fmicb.2020.586601.
- [20] Blanc-Garin, V.; Chenebault, C. *et al. Biotechnol. Biofuels* **2022**, *15*, doi:10.1186/s13068-022-02211-0.
- [24] Veaudor *et al. PLoS ONE* **2018**, *13*, e0198836.
