# Supplementary material for: Exploring the Potential of the Model Cyanobacteria Synechococcus PCC 7002 and PCC 7942 for the Photoproduction of High-Value Terpenes: A Comparison with Synechocystis PCC 6803
Source: Biomolecules. 2023 Mar 9;13(3):504. doi: 10.3390/biom13030504 (PMC10046388; doi:10.3390/biom13030504)
Supplement: Supplementary file 1 [file biomolecules-13-00504-s001.zip › Table S2.pdf]

**Table S2 – Characteristics of the primers used in this study**

| Name                                                                                                                                            | Sequence (5'-3')                         | Purpose                                                                                                                                                                                                                           |
|-------------------------------------------------------------------------------------------------------------------------------------------------|------------------------------------------|-----------------------------------------------------------------------------------------------------------------------------------------------------------------------------------------------------------------------------------|
| pC and pC derivatives                                                                                                                           |                                          |                                                                                                                                                                                                                                   |
| pC_Fw                                                                                                                                           | TCATAAATTGCTTTAAGGCG                     | Forward (Fw) and reverse (Rv) primers for PCR amplification and DNA sequencing of the terpene synthase genes cloned in pC                                                                                                         |
| pC_Rv                                                                                                                                           | GTGTAACAAGGGTGAACAC                      |                                                                                                                                                                                                                                   |
| pTwist plasmids                                                                                                                                 |                                          |                                                                                                                                                                                                                                   |
| M13_Fw                                                                                                                                          | GTAAAACGACGGCCAGT                        | DNA sequencing of inserts cloned in pTwist                                                                                                                                                                                        |
| M13_Rv                                                                                                                                          | CAGGAAACAGCTATGAC                        |                                                                                                                                                                                                                                   |
| Pinene synthase encoding gene                                                                                                                   |                                          |                                                                                                                                                                                                                                   |
| PS_Fw1                                                                                                                                          | GCGAGAAGTTGCTAGAATTGGC                   | Forward and reverse primers for DNA sequencing of PS genes                                                                                                                                                                        |
| PS_Rv1                                                                                                                                          | TAACCGCAAAATGGCGCAAA                     |                                                                                                                                                                                                                                   |
| PS_Rv2                                                                                                                                          | ACCAACGAGACAGAGACTGC                     |                                                                                                                                                                                                                                   |
| Limonene synthase encoding gene                                                                                                                 |                                          |                                                                                                                                                                                                                                   |
| LS_Rv3                                                                                                                                          | GATAGGCCCATGCGTTGAAGAT                   | Forward and reverse primers for DNA sequencing of LS genes                                                                                                                                                                        |
| LS_Fw3                                                                                                                                          | TGTCCGATTATAATGCCTCCG                    |                                                                                                                                                                                                                                   |
| Bisabolene synthase encoding gene                                                                                                               |                                          |                                                                                                                                                                                                                                   |
| BS_Fw2                                                                                                                                          | TGAGACCGACCAAGATAGC                      | Forward and reverse primers for DNA sequencing of BS genes                                                                                                                                                                        |
| BS_Fw3                                                                                                                                          | TAGGCATTGGAACGAGCG                       |                                                                                                                                                                                                                                   |
| BS_Fw4                                                                                                                                          | TATGACACCTACGGTACC                       |                                                                                                                                                                                                                                   |
| BS_Rv5                                                                                                                                          | CAAGAACTCAAGGCACTTC                      |                                                                                                                                                                                                                                   |
| Construction of the NS <sub>7002</sub> ::pR-LS-Km <sup>R</sup> and NSI <sub>7942</sub> ::pR-FS-Km <sup>R</sup> DNA cassettes by GIBSON assembly |                                          |                                                                                                                                                                                                                                   |
| Pr-fwd-S7942                                                                                                                                    | gacgagcagggactcgaccTTGACTATTTTACCTCTGGC  | Forward primer for PCR amplification of the <i>pR</i> -FS DNA cassette of the pCFS plasmid. It overlaps the upstream region of the NSI <sub>7942</sub> chromosomal site (in 5') and <i>pR</i> (in 3')                             |
| Pr-fwd-S7002                                                                                                                                    | acttaaaaactgagtaagatTTGACTATTTTACCTCTGGC | Forward primer for PCR amplification of the <i>pR</i> -LS and <i>pR</i> -FS DNA cassettes of the pCLS and pCFS plasmids. It overlaps the upstream region of the NS <sub>7002</sub> chromosomal site (in 5') and <i>pR</i> (in 3') |
| Km-rev-S7002                                                                                                                                    | aaaacgagataaaataggatGACCTGCAGGGGGGGGGG   | Reverse primer for PCR amplification of the Km <sup>R</sup> gene of pUC4K. It overlaps the downstream region of NS <sub>7002</sub> (in 5') and the end of Km <sup>R</sup> (in 3')                                                 |

|                                                                                                                         |                                      |                                                                                                                                                                                                               |
|-------------------------------------------------------------------------------------------------------------------------|--------------------------------------|---------------------------------------------------------------------------------------------------------------------------------------------------------------------------------------------------------------|
| Pr-FS-Rv                                                                                                                | cctgcaggtcTTACATGGGAACGGGTTC         | Reverse primer for PCR amplification of the <i>pR</i> -FS cassette of pCFS. It overlaps the end of the FS gene (in 3') and the beginning of the Km <sup>R</sup> marker (in 5')                                |
| Pr-LS-Rv                                                                                                                | cctgcaggtcTTAAGCAAAGGGCTCAAAC        | Reverse primer for PCR amplification of the <i>pR</i> -LS cassette of pCLS. It overlaps the end of the LS gene (in 3') and the beginning of Km <sup>R</sup> (in 5')                                           |
| KM-FS-Fwd                                                                                                               | tcccatgtaaGACCTGCAGGGGGGGGGG         | Forward primer for PCR amplification of the Km <sup>R</sup> gene of pUC4K. It overlaps the end of FS (in 3') and the beginning of Km <sup>R</sup> (in 5')                                                     |
| KM-LS-Fwd                                                                                                               | cttgcttaaGACCTGCAGGGGGGGGGG          | Forward primer for PCR amplification of the Km <sup>R</sup> gene of pUC4K. It overlaps the end of LS (in 3') and the beginning of Km <sup>R</sup> (in 5')                                                     |
| KM-rev-S7942                                                                                                            | ttctgctccagaagccccGACCTGCAGGGGGGGGGG | Reverse primer for PCR amplification of the Km <sup>R</sup> gene of pUC4K. It overlaps the downstream region of NSI neutral site (in 5') and the end of Km <sup>R</sup> (in 3')                               |
| <b>Plasmids and <i>Synechococcus</i> PCC 7002 and <i>Synechococcus</i> PCC 7942 strains harboring the DNA cassettes</b> |                                      |                                                                                                                                                                                                               |
| NS_S7002_Fw                                                                                                             | ATTGGGGAATAGTGCGAC                   | PCR amplification of the <i>pR</i> -LS-Km <sup>R</sup> and <i>pR</i> -FS-Km <sup>R</sup> DNA cassette inserted into the NS <sub>7002</sub> chromosomal site of S.7002, and analysis of chromosome segregation |
| NS_S7002_Rv                                                                                                             | ATGTGCTTTCAGCAAAAGTT                 |                                                                                                                                                                                                               |
| NS7942_Fwd                                                                                                              | CACAGACATCTAGATAGTCCTCAA             | PCR amplification and DNA sequencing of the FS expression cassette ( <i>pR</i> -FS-Km <sup>R</sup> ) cloned into the NSI <sub>7942</sub> chromosomal site of S.7942, and analysis of chromosome segregation.  |
| NS7942_Rv                                                                                                               | CTGAAGCGGACATTGCTA                   |                                                                                                                                                                                                               |
